# Supplementary material for: Slug inhibits the proliferation and tumor formation of human cervical cancer cells by up-regulating the p21/p27 proteins and down-regulating the activity of the Wnt/β-catenin signaling pathway via the trans-suppression Akt1/p-Akt1 expression
Source: PubMed Central journal article supplement (PMC5041971; doi:10.18632/oncotarget.8434), 2016-03-28
Supplement: oncotarget-07-26152-s001.pdf [file oncotarget-07-26152-s001.pdf]

## Slug inhibits the proliferation and tumor formation of human cervical cancer cells by up-regulating the p21/p27 proteins and down-regulating the activity of the Wnt/ $\beta$ -catenin signaling pathway via the trans-suppression Akt1/p-Akt1 expression

### Supplementary Materials

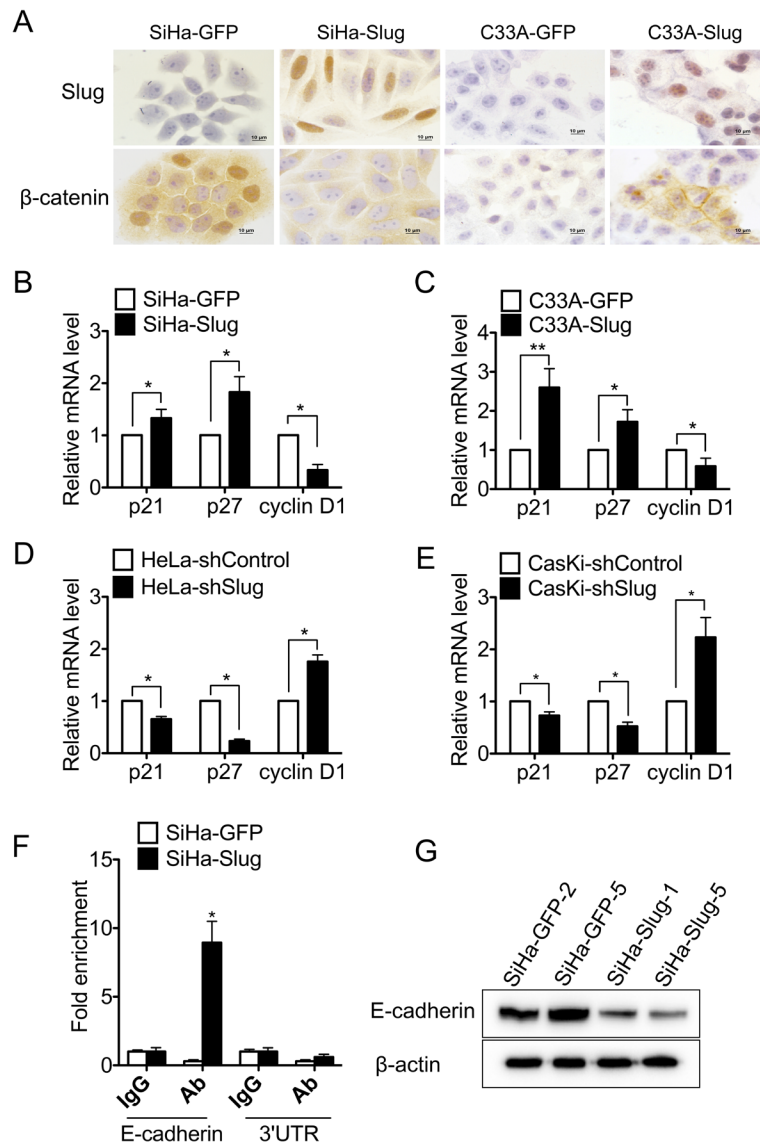

**Supplementary Figure S1:** (A) IHC detection of  $\beta$ -catenin and slug in SiHa-GFP, SiHa-Slug, C33A-GFP and C33A-Slug cells. (B) The expression of p21, p27 and cyclinD1 in SiHa-GFP and SiHa-Slug cells was detected by quantitative real-time-PCR. (C) The expression of p21, p27 and cyclinD1 in C33A-GFP and C33A-Slug cells was detected by quantitative real-time-PCR. (D) The expression of p21, p27 and cyclinD1 in HeLa-shControl and HeLa-shSlug cells was detected by quantitative real-time-PCR. (E) The expression of p21, p27 and cyclinD1 in CasKi-shControl and CasKi-shSlug cells was detected by quantitative real-time-PCR. (F) A quantitative CHIP assay of the E-cadherin promoter region in SiHa-Slug and SiHa-GFP cells is shown. (G) The expression of E-cadherin in SiHa-Slug and SiHa-GFP cells was detected by western blotting. The data were shown as the mean  $\pm$  SD of three independent experiments. \* $p$  < 0.05, \*\* $p$  < 0.01 vs. control using One-Way ANOVA.

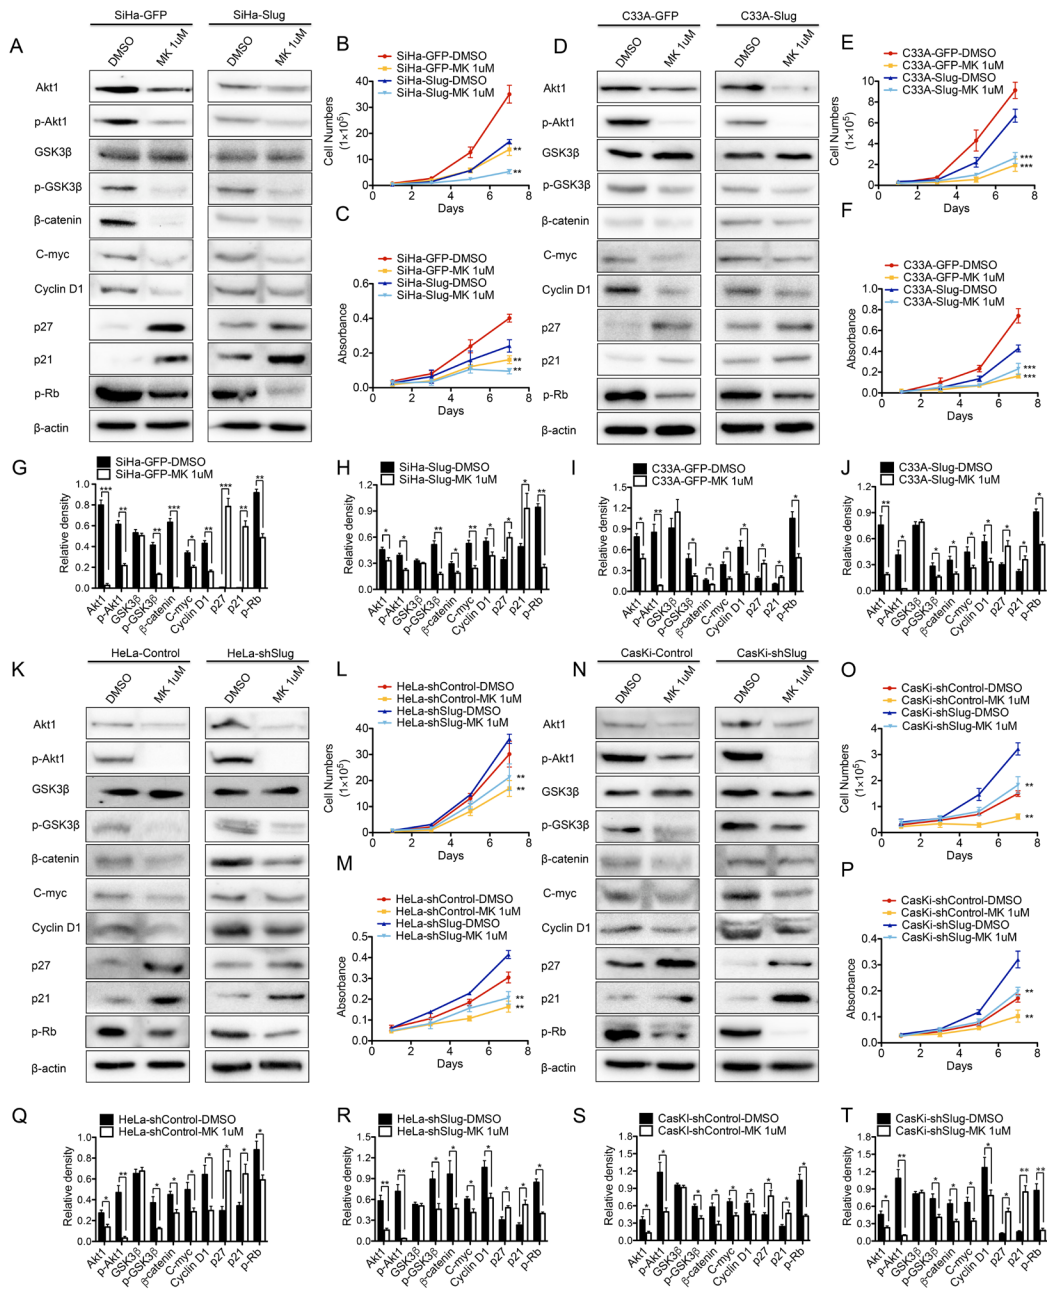

**Supplementary Figure S2: Blockage of the Akt1/p-Akt1 suppresses cell proliferation in the slug-modified cervical cancer cells by MK-2206.** (A) The expression of Akt1, p-Akt1, p21, p27, p-Rb, p-GSK3β, GSK3β, β-catenin, c-myc and cyclinD1 in MK-treated SiHa-GFP and SiHa-Slug cells was detected by western blotting, and the quantitative analysis was shown (G and H). The proliferation and viability of MK-treated SiHa-GFP and SiHa-Slug cells were detected by growth curves (B) and MTT assay (C). (D) The expression of Akt1, p-Akt1, p21, p27, p-Rb, p-GSK3β, GSK3β, β-catenin, c-myc and cyclinD1 in MK-treated C33A-GFP and C33A-Slug cells was detected by western blotting, and the quantitative analysis was shown (I and J). The proliferation and viability of MK-treated C33A-GFP and C33A-Slug cells were detected by growth curves (E) and MTT assay (F). (K) The expression of Akt1, p-Akt1, p21, p27, p-Rb, p-GSK3β, GSK3β, β-catenin, c-myc and cyclinD1 in MK-treated HeLa-shControl and HeLa-shSlug cells was detected by western blotting, and the quantitative analysis was shown (Q and R). The proliferation and viability of MK-treated HeLa-shControl and HeLa-shSlug cells were detected by growth curves (L) and MTT assay (M). (N) The expression of Akt1, p-Akt1, p21, p27, p-Rb, p-GSK3β, GSK3β, β-catenin, c-myc and cyclinD1 in MK-treated Caski-shControl and Caski-shSlug cells was detected by western blotting, and the quantitative analysis was shown (S and T). The proliferation and viability of MK-treated Caski-shControl and Caski-shSlug cells were detected by growth curves (O) and MTT assay (P). The data were shown as the mean ± SD of three independent experiments. \* $p < 0.05$ , \*\* $p < 0.01$  vs. control using One-Way ANOVA.

**Supplementary Table S1: Slug expression levels in different tissue specimen**

| Specimens             | Total | Slug Staining                      |                                   | P                   |
|-----------------------|-------|------------------------------------|-----------------------------------|---------------------|
|                       |       | Negative, No. (%)                  | Positive, No. (%)                 |                     |
| Normal                | 38    | 4.667 ± 0.5774<br>(12.69 ± 0.8083) | 33.33 ± 0.5774<br>(87.72 ± 1.518) |                     |
| Cancer <i>in situ</i> | 24    | 9.667 ± 1.155<br>(40.28 ± 4.809)   | 14.33 ± 1.155<br>(59.73 ± 4.792)  | < 0.05 <sup>a</sup> |
| Carcinoma             | 52    | 17.67 ± 1.155<br>(33.96 ± 2.200)   | 31.67 ± 1.155<br>(62.18 ± 2.217)  | < 0.05 <sup>b</sup> |

Abbreviation: Slug

Pearson 2-tailed chi-square test was used to determine the statistical significance of the level of expression of Slug in different tissue specimens.

<sup>a</sup>Normal cervix versus cervical cancer in situ.

<sup>b</sup>Normal cervix versus carcinoma.

**Supplementary Table S2: The list of primer sequences that used for luciferase assays in this study**

| Primer name | Location     | F/R | Sequence                     |
|-------------|--------------|-----|------------------------------|
| P1          | -585 ~ -355  | F   | CGACGCGTCTTTTGTGAGTGTAG      |
|             |              | R   | GGAAGATCTTGGCTTAGGTTGACTT    |
| P2          | -767 ~ -511  | F   | CGACGCGTTGGACTTCGGACT        |
|             |              | R   | GGAAGATCTTGGCAGCTACACTCAC    |
| P3          | -831 ~ -706  | F   | CGACGCGTTGTCCAGGAGAAAG       |
|             |              | R   | GGAAGATCTTGCTGGGTGGACTTG     |
| P4          | -886 ~ -744  | F   | CGACGCGTAGAATTCTGGCT         |
|             |              | R   | GGAAGATCTGGAATGAGTAAGTGG     |
| P5          | -918 ~ -846  | F   | CGACGCGTAACTCTGGAATGG        |
|             |              | R   | GGAAGATCTACCCCTTCCTAGCC      |
| P6          | -1012 ~ -888 | F   | CGACGCGTAATAAAAATGCTCC       |
|             |              | R   | GGAAGATCTCCATTCCAGAGGC       |
| P7          | -1116 ~ -923 | F   | CGACGCGTATTGGCTGCAGACT       |
|             |              | R   | GGAAGATCTCGTGAAAGACAGACTCTTG |
| P8          | -1345 ~ -221 | F   | CGACGCGTAAACCCTTGTGTCAGGT    |
|             |              | R   | GGAAGATCTTCTCTGGCCTCAGTTTC   |

**Supplementary Table S3: The list of primer sequences that used for chromatin immunoprecipitation assay (ChIP) in this study**

| Primer name       | Location     | F/R | Sequence             |
|-------------------|--------------|-----|----------------------|
| <b>P1</b>         | -534 ~ -462  | F   | TCAAAGCCTTCCTGCTCCTT |
|                   |              | R   | AAGGAAGTGCGGGAGGAT   |
| <b>P2</b>         | -738 ~ -644  | F   | AGGCTGACCAAGTCC      |
|                   |              | R   | GAGCAGACACCAGACAG    |
| <b>P3</b>         | -824 ~ -717  | F   | GTGTCCAGGAGAAAGG     |
|                   |              | R   | ATGGGTGGACTTGGTC     |
| <b>P4</b>         | -876 ~ -788  | F   | AACTTCTGGCTAGGAAGG   |
|                   |              | R   | GAGTAAGTGGGACACAGAC  |
| <b>P5</b>         | -915 ~ -858  | F   | TGTGGGCCTCTGGAATG    |
|                   |              | R   | CCTTCTAGCCAGAAGTTC   |
| <b>P6</b>         | -982 ~ -900  | F   | CAATACTTAGCAGCCTCAGG |
|                   |              | R   | TTCCAGAGGCCACAGTT    |
| <b>P7</b>         | -1068 ~ -985 | F   | CTGCCTCTGTCTGCATCT   |
|                   |              | R   | TTGGGGGAGCATTTTTAT   |
| <b>3'UTR</b>      | Akt1 (3'UTR) | F   | CGTTTTTGTGCTGTGGGC   |
|                   |              | R   | CATTTCCCTACGTGAATCG  |
| <b>E-cadherin</b> | -25 ~ 110    | F   | CGTCGGAAGTCAAAGC     |
|                   |              | R   | TATGTGCGGTGGGTCG     |
